# Supplementary material for: Evaluation of Functionality and Biological Responses of Mytilus galloprovincialis after Exposure to Quaternium-15 (Methenamine 3-Chloroallylochloride)
Source: PubMed Central journal article supplement (PMC6273939; doi:10.3390/molecules21020144), 2016-01-26
Supplement: molecules-21-00144-s001.pdf [file molecules-21-00144-s001.pdf]

## Supplementary Materials: Evaluation of Functionality and Biological Responses of *Mytilus galloprovincialis* after Exposure to Quaternium-15 (Methenamine 3-Chloroallylochloride)

Maria Pagano †, Gioele Capillo †, Marilena Sanfilippo, Simon Palato, Francesca Trischitta, Antonio Manganaro and Caterina Faggio \*

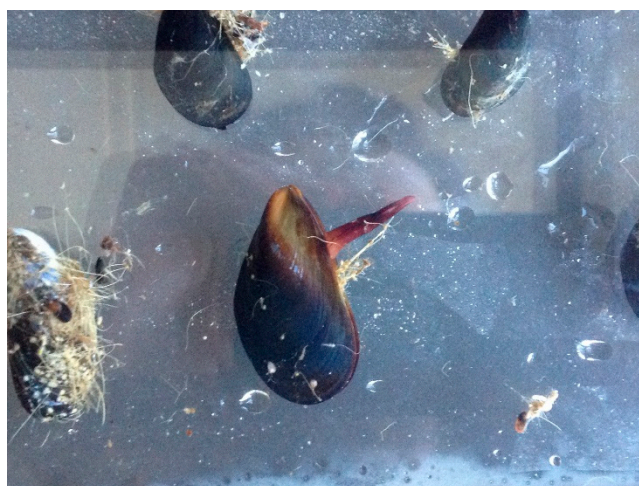

**Figure S1.** Evidence of mucus production in the tank in presence of quaternium-15 (2 mg/L).

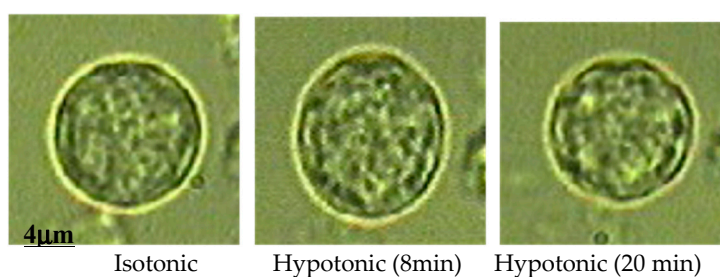

**Figure S2.** Digitized images of a digestive cell showing area changes evoked by rapid shifts in the hypotonic solution. After the swelling the cell recovers own volume.

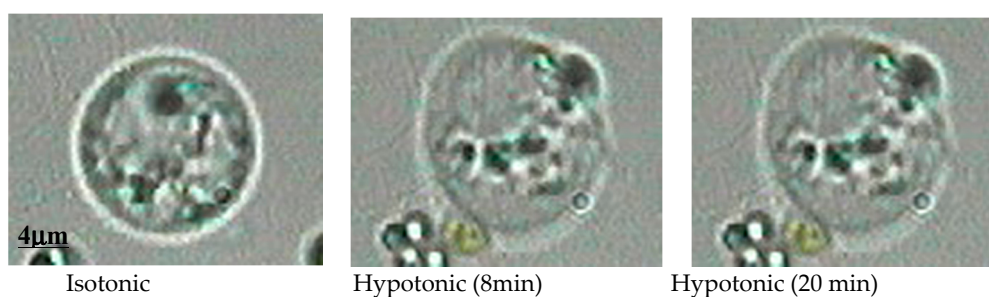

**Figure S3.** Digitized images of a digestive cells, preincubated in quaternium-15 (1 mg/L), showing area changes evoked by rapid shifts in the hypotonic solution. After the swelling the cell doesn't recover own volume.

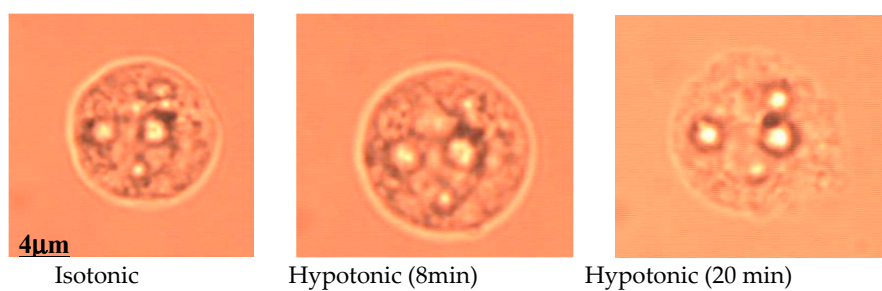

**Figure S4.** Digitized images of a digestive cells preincubated in quaternium-15 (2 mg/L) showing area changes evoked by rapid shifts in the hypotonic solution. After the swelling the cell doesn't recover own volume.

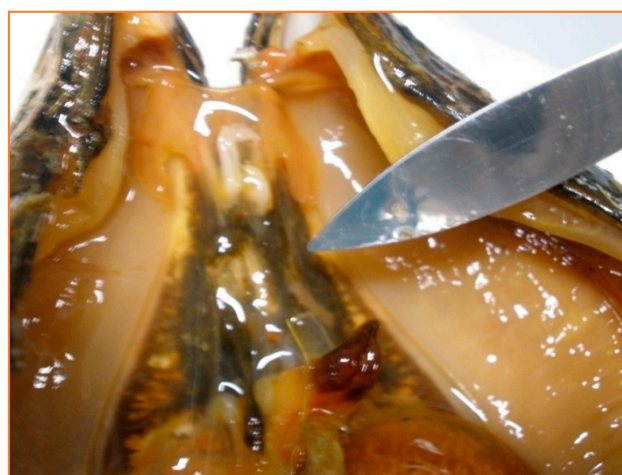

**Figure S5.** Hepatopancreas before the isolation.
